# Supplementary material
Source: publisher site journal article supplement (https://www.spandidos-publications.com/1937/downloadSupplementary)
Supplement: Supplementary file 1 [file downloadSupplementary]

## Sheet: Sheet1
Table SIII. A list of 208 downregulated transcripts responsive to space radiation.
Gene ID	F-1G	F-µG	F-µG + melatonin	G + melatonin	G	NTname	subjectid	Identity(%)	Name	Species
comp172591_c0_seq1	-1.15298	-1.15625	-0.0944407	1.32668	1.23551	CTNA1_MOUSE_Catenin_alpha-1_OS=Mus_musculus_GN=Ctnna1_PE=1_SV=1	P26231	100	catenin (cadherin associated protein), alpha 1(Ctnna1)	Mus musculus
comp60220_c0_seq1	-0.173761	-0.0844373	0.710572	2.75998	0.404888	HXDCA_DANRE_Homeobox_protein_Hox-D12a_OS=Danio_rerio_GN=hoxd12a_PE=2_SV=2	Q90471	82.66	homeobox D12a(hoxd12a)	Danio rerio
comp64262_c0_seq4	-1.00869	-0.996177	0.00187397	0.552085	0.355003	ILDR1_HUMAN_Immunoglobulin-like_domain-containing_receptor_1_OS=Homo_sapiens_GN=ILDR1_PE=1_SV=2	Q86SU0	54.14	immunoglobulin like domain containing receptor 1(ILDR1)	Homo sapiens
comp66834_c0_seq3	-0.218421	-0.218421	2.45351	2.1425	0.318235	BIRC7_XENTR_Baculoviral_IAP_repeat-containing_protein_7_OS=Xenopus_tropicalis_GN=birc7_PE=2_SV=1	A9JTP3	51.78	baculoviral IAP repeat containing 7(birc7)	Xenopus tropicalis
comp66917_c0_seq3	-0.952624	-1.0125	0.955064	0.322866	-0.167448	IKBZ_BOVIN_NF-kappa-B_inhibitor_zeta_OS=Bos_taurus_GN=NFKBIZ_PE=2_SV=2	Q9BE45	57.81	NFKB inhibitor zeta(NFKBIZ)	Bos taurus
comp69261_c0_seq1	0.244953	-1.6511	-0.835978	0.529001	0.902744	MFAP4_BOVIN_Microfibril-associated_glycoprotein_4_OS=Bos_taurus_GN=MFAP4_PE=1_SV=2	P55918	44.14	microfibrillar associated protein 4(MFAP4)	Bos taurus
comp69314_c1_seq1	-0.761925	-0.74441	0.391526	1.17034	-0.0242736	TEN3_HUMAN_Teneurin-3_OS=Homo_sapiens_GN=ODZ3_PE=2_SV=3	Q9P273	88.61	teneurin transmembrane protein 3(TENM3)	Homo sapiens
comp70900_c0_seq1	-0.529864	-0.66211	0.154099	0.830205	-0.148894	F180A_MOUSE_Protein_FAM180A_OS=Mus_musculus_GN=Fam180a_PE=2_SV=1	Q8BR21	38.75	family with sequence similarity 180, member A(Fam180a)	Mus musculus
comp71231_c0_seq2	-0.987604	-3.13249	0.0514476	1.96502	0.457428	PGBM_MOUSE_Basement_membrane-specific_heparan_sulfate_proteoglycan_core_protein_OS=Mus_musculus_GN=Hspg2_PE=1_SV=1	Q05793	47.69	perlecan (heparan sulfate proteoglycan 2)(Hspg2)	Mus musculus
comp72378_c0_seq1	-0.748794	-1.17037	0.531922	0.786556	-0.0732826	HIPK2_HUMAN_Homeodomain-interacting_protein_kinase_2_OS=Homo_sapiens_GN=HIPK2_PE=1_SV=2	Q9H2X6	86.71	homeodomain interacting protein kinase 2(HIPK2)	Homo sapiens
comp72393_c0_seq2	-0.364078	-1.74492	-1.10358	0.653758	0.672631	HMCN1_HUMAN_Hemicentin-1_OS=Homo_sapiens_GN=HMCN1_PE=1_SV=2	Q96RW7	73.11	hemicentin 1(HMCN1)	Homo sapiens
comp72629_c0_seq1	-1.01582	-0.626416	-0.0574303	0.519528	0.333753	FRY_HUMAN_Protein_furry_homolog_OS=Homo_sapiens_GN=FRY_PE=1_SV=1	Q5TBA9	90.33	FRY microtubule binding protein(FRY)	Homo sapiens
comp72899_c0_seq5	-0.28296	-1.05945	-0.50917	0.628225	0.544663	NOV_COTJA_Protein_NOV_OS=Coturnix_coturnix_japonica_GN=NOV_PE=2_SV=1	P42642	46.36	nephroblastoma overexpressed(NOV)	Coturnix japonica
comp73169_c0_seq1	-0.89624	-1.1607	-0.0971033	0.659311	0.22636	GPR98_DANRE_G-protein_coupled_receptor_98_OS=Danio_rerio_GN=gpr98_PE=2_SV=1	Q6JAN0	92.99	adhesion G protein-coupled receptor V1(adgrv1)	Danio rerio
comp73197_c0_seq1	-0.590027	-0.894725	0.136232	0.166989	0.11033	AGTR1_BOVIN_Type-1_angiotensin_II_receptor_OS=Bos_taurus_GN=AGTR1_PE=2_SV=1	P25104	28.42	angiotensin II receptor type 1(AGTR1)	Bos taurus
comp73447_c1_seq1	-0.645505	-0.45178	0.19304	0.84132	0.316543	Z512B_HUMAN_Zinc_finger_protein_512B_OS=Homo_sapiens_GN=ZNF512B_PE=1_SV=1	Q96KM6	63.64	zinc finger protein 512B(ZNF512B)	Homo sapiens
comp73525_c0_seq5	-0.831965	-1.58143	0.254256	0.272168	-0.382515	MAFB_DANRE_Transcription_factor_MafB_OS=Danio_rerio_GN=mafb_PE=2_SV=1	Q98UK5	46.57	v-maf avian musculoaponeurotic fibrosarcoma oncogene homolog Ba(mafba)	Danio rerio
comp74213_c1_seq1	-0.12594	-2.46832	-1.82981	0.794532	0.982392	CO3_ONCMY_Complement_C3_(Fragment)_OS=Oncorhynchus_mykiss_GN=c3_PE=1_SV=1	P98093	56.99	complement component C3(c3-1)	Oncorhynchus mykiss
comp74213_c1_seq2	0.0626753	-1.83982	-1.09502	0.449669	0.548654	CO3_ONCMY_Complement_C3_(Fragment)_OS=Oncorhynchus_mykiss_GN=c3_PE=1_SV=1	P98093	54.66	complement component C3(c3-1)	Oncorhynchus mykiss
comp74651_c0_seq2	0.0152623	-1.80256	-0.800811	0.363943	0.5906	CFAB_PANTR_Complement_factor_B_OS=Pan_troglodytes_GN=CFB_PE=3_SV=1	Q864W0	37.45	complement factor B(CFB)	Pan troglodytes
comp74664_c0_seq1	0.0170333	-0.715656	-0.217709	0.29089	0.463483	CD22_PANPA_B-cell_receptor_CD22_(Fragment)_OS=Pan_paniscus_GN=CD22_PE=2_SV=1	Q9N1E5	31.45	CD22 molecule(CD22)	Pan paniscus
comp74678_c1_seq1	-0.149362	-0.728285	-0.295301	0.53835	0.290447	RAB30_MOUSE_Ras-related_protein_Rab-30_OS=Mus_musculus_GN=Rab30_PE=2_SV=1	Q923S9	87.06	RAB30, member RAS oncogene family(Rab30)	Mus musculus
comp74776_c0_seq3	-0.299395	-0.612636	-0.0163541	0.583714	0.134258	DUS2_MOUSE_Dual_specificity_protein_phosphatase_2_OS=Mus_musculus_GN=Dusp2_PE=2_SV=2	Q05922	53.27	dual specificity phosphatase 2(Dusp2)	Mus musculus
comp74777_c0_seq1	-0.107447	-1.65675	-1.12628	0.380892	0.683723	CFAI_MOUSE_Complement_factor_I_OS=Mus_musculus_GN=Cfi_PE=1_SV=3	Q61129	41.2	complement component factor i(Cfi)	Mus musculus
comp74946_c0_seq1	-0.058755	-1.147	-0.212708	0.952908	0.708836	EOMES_XENLA_Eomesodermin_OS=Xenopus_laevis_GN=eomes_PE=2_SV=1	P79944	89.39	eomesodermin L homeolog(eomes.L)	Xenopus laevis
comp75470_c0_seq1	-0.26777	-0.506236	0.600154	0.202693	0.145195	BCL2_CHICK_Apoptosis_regulator_Bcl-2_OS=Gallus_gallus_GN=BCL2_PE=2_SV=1	Q00709	46.12	B-cell CLL/lymphoma 2(BCL2)	Gallus gallus
comp75844_c0_seq5	-0.411565	-0.995007	0.186683	0.383586	0.0784297	RSLBB_DANRE_Ras-like_protein_family_member_11B_OS=Danio_rerio_GN=rasl11b_PE=2_SV=1	Q6P0U3	51.65	RAS-like, family 11, member B(rasl11b)	Danio rerio
comp76110_c1_seq1	-0.646744	-2.26331	0.270775	1.14065	0.119644	FOXN2_HUMAN_Forkhead_box_protein_N2_OS=Homo_sapiens_GN=FOXN2_PE=2_SV=3	P32314	49.77	forkhead box N2(FOXN2)	Homo sapiens
comp76142_c0_seq2	-0.484824	-0.490146	0.149591	0.444978	0.125724	SH2B3_HUMAN_SH2B_adapter_protein_3_OS=Homo_sapiens_GN=SH2B3_PE=2_SV=2	Q9UQQ2	37.01	SH2B adaptor protein 3(SH2B3)	Homo sapiens
comp76222_c1_seq1	-0.236676	-1.38931	-0.512995	0.293602	0.669098	CXCR1_RABIT_C-X-C_chemokine_receptor_type_1_OS=Oryctolagus_cuniculus_GN=CXCR1_PE=2_SV=2	P21109	48	C-X-C motif chemokine receptor 1(CXCR1)	Oryctolagus cuniculus
comp76252_c2_seq1	-0.351253	-1.37602	-0.154662	1.31474	0.0830046	VDRB_DANRE_Vitamin_D3_receptor_B_OS=Danio_rerio_GN=vdrb_PE=2_SV=2	Q1L673	97.78	vitamin D (1,25- dihydroxyvitamin D3) receptor b(vdrb)	Danio rerio
comp76641_c0_seq1	-0.372662	-0.579116	0.0131532	0.664263	0.0822061	PCLI1_MOUSE_PTB-containing,_cubilin_and_LRP1-interacting_protein_OS=Mus_musculus_GN=Pid1_PE=1_SV=2	Q3UBG2	70.59	phosphotyrosine interaction domain containing 1(Pid1)	Mus musculus
comp76810_c2_seq1	-0.47138	-0.360396	0.0387826	0.539316	0.150648	GNAS_MESAU_Guanine_nucleotide-binding_protein_G(s)_subunit_alpha_OS=Mesocricetus_auratus_GN=GNAS_PE=2_SV=1	P63093	87.5	GNAS complex locus(Gnas)	Mesocricetus auratus
comp76841_c2_seq2	-1.00178	-1.08499	0.33635	1.09113	0.112888	FGF3_DANRE_Fibroblast_growth_factor_3_OS=Danio_rerio_GN=fgf3_PE=1_SV=1	P48802	96.1	fibroblast growth factor 3(fgf3)	Danio rerio
comp76889_c0_seq7	0.209312	-1.00639	-0.453293	0.394472	0.683823	SPIT2_MOUSE_Kunitz-type_protease_inhibitor_2_OS=Mus_musculus_GN=Spint2_PE=2_SV=1	Q9WU03	41.4	serine protease inhibitor, Kunitz type 2(Spint2)	Mus musculus
comp77065_c1_seq3	-1.2535	-1.25677	1.86196	1.55858	-0.50039	MAFK_MOUSE_Transcription_factor_MafK_OS=Mus_musculus_GN=Mafk_PE=2_SV=1	Q61827	85.71	v-maf musculoaponeurotic fibrosarcoma oncogene family, protein K (avian)(Mafk)	Mus musculus
comp77099_c0_seq1	-0.525706	-0.89774	0.414387	0.720145	0.036574	CDN1B_CRIGR_Cyclin-dependent_kinase_inhibitor_1B_OS=Cricetulus_griseus_GN=CDKN1B_PE=2_SV=1	Q60439	44.38	cyclin dependent kinase inhibitor 1B(Cdkn1b)	Cricetulus griseus
comp77099_c0_seq4	-0.541054	-0.698549	0.494333	0.954623	-0.00414658	CDN1B_CRIGR_Cyclin-dependent_kinase_inhibitor_1B_OS=Cricetulus_griseus_GN=CDKN1B_PE=2_SV=1	Q60439	41.88	cyclin dependent kinase inhibitor 1B(Cdkn1b)	Cricetulus griseus
comp77391_c0_seq1	-0.0106525	-1.75079	-0.707522	0.879138	0.855368	TPOR_HUMAN_Thrombopoietin_receptor_OS=Homo_sapiens_GN=MPL_PE=1_SV=1	P40238	23.91	MPL proto-oncogene, thrombopoietin receptor(MPL)	Homo sapiens
comp77391_c0_seq5	-0.301725	-1.65677	-1.11079	1.13712	1.22364	TPOR_MOUSE_Thrombopoietin_receptor_OS=Mus_musculus_GN=Mpl_PE=2_SV=2	Q08351	25.76	myeloproliferative leukemia virus oncogene(Mpl)	Mus musculus
comp77437_c2_seq6	-0.595724	-0.50901	0.580997	1.27893	0.00179593	FA69C_HUMAN_Protein_FAM69C_OS=Homo_sapiens_GN=FAM69C_PE=2_SV=3	Q0P6D2	58.09	family with sequence similarity 69 member C(FAM69C)	Homo sapiens
comp77473_c0_seq1	-0.0223697	-0.945938	-0.273987	0.454835	0.408589	FFAR2_MOUSE_Free_fatty_acid_receptor_2_OS=Mus_musculus_GN=Ffar2_PE=2_SV=1	Q8VCK6	52.5	free fatty acid receptor 2(Ffar2)	Mus musculus
comp77518_c0_seq2	-0.483317	-0.908999	0.149437	0.749146	0.618238	CDN1B_CANFA_Cyclin-dependent_kinase_inhibitor_1B_OS=Canis_familiaris_GN=CDKN1B_PE=2_SV=1	Q6SLL5	36.8	cyclin dependent kinase inhibitor 1B(CDKN1B)	Canis lupus familiaris
comp77519_c3_seq2	-0.660353	-0.592391	0.236734	0.747933	-0.191925	ADA10_RAT_Disintegrin_and_metalloproteinase_domain-containing_protein_10_(Fragment)_OS=Rattus_norvegicus_GN=Adam10_PE=2_SV=1	Q10743	86.81	ADAM metallopeptidase domain 10(Adam10)	Rattus norvegicus
comp77646_c0_seq1	-0.377377	-0.551342	0.160368	0.81309	0.107299	H10_XENTR_Histone_H1.0_OS=Xenopus_tropicalis_GN=h1f0_PE=2_SV=1	Q6NVM0	72.6	H1 histone family member 0(h1f0)	Xenopus tropicalis
comp77688_c0_seq14	-0.62724	-0.824163	0.262509	0.43347	0.17918	FBXL3_MOUSE_F-box/LRR-repeat_protein_3_OS=Mus_musculus_GN=Fbxl3_PE=1_SV=1	Q8C4V4	85.81	F-box and leucine-rich repeat protein 3(Fbxl3)	Mus musculus
comp77692_c0_seq4	-0.814351	-0.459968	0.797303	0.44098	-0.00859896	RHOU_MOUSE_Rho-related_GTP-binding_protein_RhoU_OS=Mus_musculus_GN=Rhou_PE=2_SV=1	Q9EQT3	83.16	ras homolog family member U(Rhou)	Mus musculus
comp77710_c0_seq1	-0.597813	-0.881046	0.151185	1.18073	0.634006	XYLT1_HUMAN_Xylosyltransferase_1_OS=Homo_sapiens_GN=XYLT1_PE=1_SV=1	Q86Y38	75.25	xylosyltransferase 1(XYLT1)	Homo sapiens
comp77710_c0_seq3	-1.36723	-0.876879	0.418406	0.40372	1.0275	XYLT1_PANTR_Xylosyltransferase_1_OS=Pan_troglodytes_GN=XYLT1_PE=2_SV=1	Q5QQ57	70.59	xylosyltransferase 1(XYLT1)	Pan troglodytes
comp77749_c0_seq1	-0.268909	-2.37381	-1.14098	0.354288	0.45295	CO3_ONCMY_Complement_C3_(Fragment)_OS=Oncorhynchus_mykiss_GN=c3_PE=1_SV=1	P98093	51.65	complement component C3(c3-1)	Oncorhynchus mykiss
comp77749_c0_seq2	0.102376	-1.69459	-1.1021	0.641048	0.705216	CO3_ONCMY_Complement_C3_(Fragment)_OS=Oncorhynchus_mykiss_GN=c3_PE=1_SV=1	P98093	53.96	complement component C3(c3-1)	Oncorhynchus mykiss
comp77749_c0_seq3	-0.0536103	-1.96262	-1.15308	0.267919	0.525049	CO3_ONCMY_Complement_C3_(Fragment)_OS=Oncorhynchus_mykiss_GN=c3_PE=1_SV=1	P98093	51.98	complement component C3(c3-1)	Oncorhynchus mykiss
comp77939_c3_seq1	-0.87491	-0.926428	1.33053	1.20557	-0.181171	PURA_MOUSE_Transcriptional_activator_protein_Pur-alpha_OS=Mus_musculus_GN=Pura_PE=1_SV=1	P42669	83.04	purine rich element binding protein A(Pura)	Mus musculus
comp77972_c1_seq2	0.295346	-1.03126	-0.610539	0.119315	0.874733	FYB_HUMAN_FYN-binding_protein_OS=Homo_sapiens_GN=FYB_PE=1_SV=2	O15117	27.83	FYN binding protein(FYB)	Homo sapiens
comp78148_c0_seq3	-0.400225	-0.705685	0.250804	0.547694	-0.0124524	CDN1B_MOUSE_Cyclin-dependent_kinase_inhibitor_1B_OS=Mus_musculus_GN=Cdkn1b_PE=1_SV=1	P46414	44.83	cyclin-dependent kinase inhibitor 1B(Cdkn1b)	Mus musculus
comp78148_c0_seq4	-0.46077	-0.730879	0.384584	0.621481	-0.020548	CDN1B_MOUSE_Cyclin-dependent_kinase_inhibitor_1B_OS=Mus_musculus_GN=Cdkn1b_PE=1_SV=1	P46414	44.83	cyclin-dependent kinase inhibitor 1B(Cdkn1b)	Mus musculus
comp78158_c2_seq4	-0.408393	-0.67241	0.193371	0.688604	0.175274	MEF2D_XENLA_Myocyte-specific_enhancer_factor_2D_homolog_OS=Xenopus_laevis_GN=mef2d_PE=1_SV=1	Q03413	66.48	myocyte enhancer factor 2D S homeolog(mef2d.S)	Xenopus laevis
comp78230_c0_seq1	-0.485313	-0.565885	0.340087	0.737282	-0.045431	KC1G1_DANRE_Casein_kinase_I_isoform_gamma-1_OS=Danio_rerio_GN=csnk1g1_PE=2_SV=1	Q5PRD4	96.21	casein kinase 1, gamma 1(csnk1g1)	Danio rerio
comp78238_c1_seq1	-0.580545	-0.828845	0.0451771	0.0400658	0.13216	P73_MOUSE_Tumor_protein_p73_OS=Mus_musculus_GN=Tp73_PE=1_SV=1	Q9JJP2	72.87	transformation related protein 73(Trp73)	Mus musculus
comp78308_c0_seq2	-0.541404	-0.522269	0.643382	0.651932	0.0519498	RNF6_HUMAN_E3_ubiquitin-protein_ligase_RNF6_OS=Homo_sapiens_GN=RNF6_PE=1_SV=1	Q9Y252	63.1	ring finger protein 6(RNF6)	Homo sapiens
comp78596_c0_seq3	-0.76301	-0.436138	0.848216	1.18879	0.00978994	UBP2L_HUMAN_Ubiquitin-associated_protein_2-like_OS=Homo_sapiens_GN=UBAP2L_PE=1_SV=2	Q14157	88.3	ubiquitin associated protein 2 like(UBAP2L)	Homo sapiens
comp78664_c4_seq12	-0.386732	-0.417803	0.184264	0.793846	0.0684872	GPM6B_HUMAN_Neuronal_membrane_glycoprotein_M6-b_OS=Homo_sapiens_GN=GPM6B_PE=2_SV=2	Q13491	81.85	glycoprotein M6B(GPM6B)	Homo sapiens
comp78664_c4_seq2	-0.453856	-0.391967	0.219319	0.699822	0.0458365	GPM6B_HUMAN_Neuronal_membrane_glycoprotein_M6-b_OS=Homo_sapiens_GN=GPM6B_PE=2_SV=2	Q13491	81.85	glycoprotein M6B(GPM6B)	Homo sapiens
comp78670_c1_seq3	-0.266986	-0.430085	0.12526	0.244911	0.202017	LSR_HUMAN_Lipolysis-stimulated_lipoprotein_receptor_OS=Homo_sapiens_GN=LSR_PE=1_SV=4	Q86X29	56.1	lipolysis stimulated lipoprotein receptor(LSR)	Homo sapiens
comp78670_c1_seq7	-0.368564	-0.431218	0.147428	0.112021	0.25197	LSR_HUMAN_Lipolysis-stimulated_lipoprotein_receptor_OS=Homo_sapiens_GN=LSR_PE=1_SV=4	Q86X29	56.1	lipolysis stimulated lipoprotein receptor(LSR)	Homo sapiens
comp78691_c0_seq3	-0.983471	-1.34688	0.334623	1.18908	-0.257164	MBNL3_TAKRU_Muscleblind-like_protein_3_OS=Takifugu_rubripes_GN=mbnl3_PE=2_SV=1	Q56V19	87.43	Muscleblind-like protein 3-like(mbnl3)	Takifugu rubripes
comp78732_c1_seq1	-0.544593	-0.801836	0.106383	0.31644	0.353265	LGR4_HUMAN_Leucine-rich_repeat-containing_G-protein_coupled_receptor_4_OS=Homo_sapiens_GN=LGR4_PE=2_SV=2	Q9BXB1	58.77	leucine rich repeat containing G protein-coupled receptor 4(LGR4)	Homo sapiens
comp78893_c0_seq18	-0.49121	-0.349947	0.0484505	0.444841	0.134219	LRAT_HUMAN_Lecithin_retinol_acyltransferase_OS=Homo_sapiens_GN=LRAT_PE=1_SV=2	O95237	62.16	lecithin retinol acyltransferase (phosphatidylcholine--retinol O-acyltransferase)(LRAT)	Homo sapiens
comp79180_c0_seq4	-0.364268	-0.774215	0.0304081	0.590366	0.0408111	NR1D1_BOVIN_Nuclear_receptor_subfamily_1_group_D_member_1_OS=Bos_taurus_GN=NR1D1_PE=1_SV=1	Q08E02	48.39	nuclear receptor subfamily 1 group D member 1(NR1D1)	Bos taurus
comp79290_c1_seq13	-0.629833	-0.617693	-0.0238333	0.637369	0.0716071	ABH2A_DANRE_Abhydrolase_domain-containing_protein_2-A_OS=Danio_rerio_GN=abhd2a_PE=2_SV=1	Q802V6	94.46	abhydrolase domain containing 2a(abhd2a)	Danio rerio
comp79290_c1_seq5	-0.455518	-0.0668097	0.38381	1.43084	0.471198	ABH2A_DANRE_Abhydrolase_domain-containing_protein_2-A_OS=Danio_rerio_GN=abhd2a_PE=2_SV=1	Q802V6	93.07	abhydrolase domain containing 2a(abhd2a)	Danio rerio
comp79304_c1_seq3	-0.590437	-0.529721	0.666005	0.767291	0.00334787	JUND_RAT_Transcription_factor_jun-D_OS=Rattus_norvegicus_GN=Jund_PE=2_SV=1	P52909	65.42	JunD proto-oncogene, AP-1 transcription factor subunit(Jund)	Rattus norvegicus
comp79332_c1_seq1	-0.498928	-0.846377	0.191716	0.519361	0.182576	CF089_DANRE_Bombesin_receptor-activated_protein_C6orf89_homolog_OS=Danio_rerio_GN=zgc:162255_PE=2_SV=1	A4QNX3	71.64	zgc:162255(zgc:162255)	Danio rerio
comp79533_c3_seq6	-0.396389	-1.13786	0.279118	0.426191	0.00387239	SRS11_HUMAN_Serine/arginine-rich_splicing_factor_11_OS=Homo_sapiens_GN=SRSF11_PE=1_SV=1	Q05519	76.47	serine and arginine rich splicing factor 11(SRSF11)	Homo sapiens
comp79550_c0_seq7	-0.461287	-0.517214	0.1023	0.315192	0.139562	SGPP1_RAT_Sphingosine-1-phosphate_phosphatase_1_OS=Rattus_norvegicus_GN=Sgpp1_PE=2_SV=2	Q99P55	46.96	sphingosine-1-phosphate phosphatase 1(Sgpp1)	Rattus norvegicus
comp79597_c0_seq13	-0.675341	-0.599569	0.502476	1.23972	0.0650404	SPRE2_DANRE_Sprouty-related,_EVH1_domain-containing_protein_2_OS=Danio_rerio_GN=spred2_PE=2_SV=1	Q6NYK3	88.19	sprouty-related, EVH1 domain containing 2b(spred2b)	Danio rerio
comp79635_c4_seq10	-0.70308	-0.97342	0.525063	0.836753	-0.276701	RUNX2_HUMAN_Runt-related_transcription_factor_2_OS=Homo_sapiens_GN=RUNX2_PE=1_SV=2	Q13950	80.95	runt related transcription factor 2(RUNX2)	Homo sapiens
comp79778_c0_seq1	-0.416348	-0.696627	0.579942	1.381	-0.00692272	DDAH1_MOUSE_N(G),N(G)-dimethylarginine_dimethylaminohydrolase_1_OS=Mus_musculus_GN=Ddah1_PE=1_SV=3	Q9CWS0	74.82	dimethylarginine dimethylaminohydrolase 1(Ddah1)	Mus musculus
comp79778_c0_seq6	-0.476575	-0.437022	0.0994636	1.40883	0.202447	DDAH1_RAT_N(G),N(G)-dimethylarginine_dimethylaminohydrolase_1_OS=Rattus_norvegicus_GN=Ddah1_PE=1_SV=3	O08557	77.91	dimethylarginine dimethylaminohydrolase 1(Ddah1)	Rattus norvegicus
comp79792_c0_seq4	0.117445	-1.10388	-0.344041	0.678917	0.84528	OLFM4_HUMAN_Olfactomedin-4_OS=Homo_sapiens_GN=OLFM4_PE=1_SV=1	Q6UX06	35.08	olfactomedin 4(OLFM4)	Homo sapiens
comp79831_c1_seq1	-0.085502	-0.572305	-0.110477	0.64936	0.389734	F101A_HUMAN_Protein_FAM101A_OS=Homo_sapiens_GN=FAM101A_PE=2_SV=3	Q6ZTI6	46.15	refilin A(RFLNA)	Homo sapiens
comp79831_c1_seq8	-0.224152	-0.493401	-0.0333754	0.476871	0.361097	F101A_HUMAN_Protein_FAM101A_OS=Homo_sapiens_GN=FAM101A_PE=2_SV=3	Q6ZTI6	50.68	refilin A(RFLNA)	Homo sapiens
comp79831_c1_seq9	-0.157678	-0.548944	0.0101304	0.473677	0.408888	F101A_HUMAN_Protein_FAM101A_OS=Homo_sapiens_GN=FAM101A_PE=2_SV=3	Q6ZTI6	50.68	refilin A(RFLNA)	Homo sapiens
comp79987_c0_seq4	-0.385265	-0.415287	0.123658	0.131073	0.0953329	T53I1_HUMAN_Tumor_protein_p53-inducible_nuclear_protein_1_OS=Homo_sapiens_GN=TP53INP1_PE=1_SV=1	Q96A56	47.39	tumor protein p53 inducible nuclear protein 1(TP53INP1)	Homo sapiens
comp80069_c0_seq1	-1.15675	-1.39967	1.37275	1.5239	0.463759	GHC1_HUMAN_Mitochondrial_glutamate_carrier_1_OS=Homo_sapiens_GN=SLC25A22_PE=1_SV=1	Q9H936	60.53	solute carrier family 25 member 22(SLC25A22)	Homo sapiens
comp80146_c2_seq21	-0.774397	-1.93217	0.807544	0.93708	-0.229511	SOX9B_XENLA_Transcription_factor_Sox-9-B_OS=Xenopus_laevis_GN=sox9-b_PE=2_SV=1	Q6DFF5	66.25	SRY-box 9 L homeolog(sox9.L)	Xenopus laevis
comp80176_c0_seq32	-0.464317	-0.37505	0.196408	0.733454	0.0199119	AGFG1_MOUSE_Arf-GAP_domain_and_FG_repeat-containing_protein_1_OS=Mus_musculus_GN=Agfg1_PE=1_SV=2	Q8K2K6	63.68	ArfGAP with FG repeats 1(Agfg1)	Mus musculus
comp80251_c0_seq35	-0.342407	-0.39984	0.0641042	0.318538	0.244156	MYO10_BOVIN_Unconventionnal_myosin-X_OS=Bos_taurus_GN=MYO10_PE=1_SV=1	P79114	42.51	myosin X(MYO10)	Bos taurus
comp80256_c1_seq19	-1.11245	-1.53403	1.13469	1.04459	-0.516382	S35B2_HUMAN_Adenosine_3'-phospho_5'-phosphosulfate_transporter_1_OS=Homo_sapiens_GN=SLC35B2_PE=1_SV=1	Q8TB61	74.44	solute carrier family 35 member B2(SLC35B2)	Homo sapiens
comp80423_c1_seq9	-1.34718	-0.728447	1.21464	1.26234	-0.211897	LDB1_MOUSE_LIM_domain-binding_protein_1_OS=Mus_musculus_GN=Ldb1_PE=1_SV=2	P70662	92	LIM domain binding 1(Ldb1)	Mus musculus
comp80585_c0_seq1	-1.2455	-0.794313	0.402331	0.799241	-0.0379418	F100B_DANRE_Protein_FAM100B_OS=Danio_rerio_GN=fam100b_PE=2_SV=1	Q502A3	76.54	UBA-like domain containing 2(ubald2)	Danio rerio
comp80585_c0_seq2	-0.861512	-0.691645	0.384319	1.03366	0.263467	F100B_DANRE_Protein_FAM100B_OS=Danio_rerio_GN=fam100b_PE=2_SV=1	Q502A3	75.98	UBA-like domain containing 2(ubald2)	Danio rerio
comp80585_c0_seq3	-0.962337	-0.859629	1.10753	1.21275	-0.157471	F100B_DANRE_Protein_FAM100B_OS=Danio_rerio_GN=fam100b_PE=2_SV=1	Q502A3	86.03	UBA-like domain containing 2(ubald2)	Danio rerio
comp80585_c0_seq4	-0.672048	-0.966815	1.1695	1.67068	-0.0555091	F100B_DANRE_Protein_FAM100B_OS=Danio_rerio_GN=fam100b_PE=2_SV=1	Q502A3	86.59	UBA-like domain containing 2(ubald2)	Danio rerio
comp80586_c1_seq1	-0.355611	-0.915664	0.812543	1.14427	0.202569	NACC2_MOUSE_Nucleus_accumbens-associated_protein_2_OS=Mus_musculus_GN=Nacc2_PE=2_SV=1	Q9DCM7	69.01	nucleus accumbens associated 2, BEN and BTB (POZ) domain containing(Nacc2)	Mus musculus
comp80690_c0_seq3	-0.445141	-0.603981	0.229578	0.713779	0.170176	IPMK_HUMAN_Inositol_polyphosphate_multikinase_OS=Homo_sapiens_GN=IPMK_PE=1_SV=1	Q8NFU5	56.33	inositol polyphosphate multikinase(IPMK)	Homo sapiens
comp80701_c3_seq11	-0.366455	-0.425935	0.173562	0.734032	0.113335	41_HUMAN_Protein_4.1_OS=Homo_sapiens_GN=EPB41_PE=1_SV=4	P11171	46.94	erythrocyte membrane protein band 4.1(EPB41)	Homo sapiens
comp80714_c3_seq13	-0.55586	-0.494953	-0.0607649	0.817283	0.807688	BC11B_HUMAN_B-cell_lymphoma/leukemia_11B_OS=Homo_sapiens_GN=BCL11B_PE=1_SV=1	Q9C0K0	61.14	B-cell CLL/lymphoma 11B(BCL11B)	Homo sapiens
comp80746_c0_seq6	-1.61478	-1.92423	0.92742	0.764519	-0.0449301	ARHG3_CHICK_Rho_guanine_nucleotide_exchange_factor_3_OS=Gallus_gallus_GN=Arhgef3_PE=2_SV=1	Q5ZLX4	72.26	Rho guanine nucleotide exchange factor (GEF) 3(ARHGEF3)	Gallus gallus
comp80864_c0_seq1	-0.53936	-0.393724	0.147822	0.325575	1.22224	ELF3_MOUSE_ETS-related_transcription_factor_Elf-3_OS=Mus_musculus_GN=Elf3_PE=1_SV=1	Q3UPW2	32.72	E74-like factor 3(Elf3)	Mus musculus
comp80864_c0_seq3	-1.23753	-0.416469	0.021166	0.54078	0.847863	ELF3_MOUSE_ETS-related_transcription_factor_Elf-3_OS=Mus_musculus_GN=Elf3_PE=1_SV=1	Q3UPW2	32.72	E74-like factor 3(Elf3)	Mus musculus
comp80865_c1_seq2	-0.878488	-1.4234	0.568647	0.906757	-0.106607	LFNG_DANRE_Beta-1,3-N-acetylglucosaminyltransferase_lunatic_fringe_OS=Danio_rerio_GN=lfng_PE=2_SV=2	Q8JHF2	82.95	LFNG O-fucosylpeptide 3-beta-N-acetylglucosaminyltransferase(lfng)	Danio rerio
comp80890_c0_seq24	-0.112704	-0.567365	0.0927591	0.366026	0.338487	CHL1_MOUSE_Neural_cell_adhesion_molecule_L1-like_protein_OS=Mus_musculus_GN=Chl1_PE=1_SV=1	P70232	40.39	cell adhesion molecule L1-like(Chl1)	Mus musculus
comp80980_c0_seq1	-0.604298	-0.596085	0.408174	0.180461	-0.0132678	NRM_DANRE_Nurim_OS=Danio_rerio_GN=nrm_PE=3_SV=1	Q1L911	88	nurim (nuclear envelope membrane protein(nrm)	Danio rerio
comp80987_c0_seq9	-0.170199	-0.483152	0.11387	0.692514	0.405887	PVRL4_XENTR_Poliovirus_receptor-related_protein_4_OS=Xenopus_tropicalis_GN=pvrl4_PE=2_SV=2	Q5FWR8	34.17	poliovirus receptor-related 4(pvrl4)	Xenopus tropicalis
comp80998_c0_seq20	-0.468148	-0.472522	0.217382	0.263172	-0.0792956	ADCY9_MOUSE_Adenylate_cyclase_type_9_OS=Mus_musculus_GN=Adcy9_PE=1_SV=1	P51830	81.65	adenylate cyclase 9(Adcy9)	Mus musculus
comp81006_c2_seq15	-0.792491	-0.714326	0.262404	0.685121	0.301545	ATS5_HUMAN_A_disintegrin_and_metalloproteinase_with_thrombospondin_motifs_5_OS=Homo_sapiens_GN=ADAMTS5_PE=1_SV=2	Q9UNA0	45.6	ADAM metallopeptidase with thrombospondin type 1 motif 5(ADAMTS5)	Homo sapiens
comp81030_c0_seq12	-0.447576	-1.01147	0.671416	0.920649	-0.0472425	CCNI_HUMAN_Cyclin-I_OS=Homo_sapiens_GN=CCNI_PE=1_SV=1	Q14094	51.26	cyclin I(CCNI)	Homo sapiens
comp81030_c0_seq2	-0.60458	-1.11143	0.308229	0.532636	-0.068994	CCNI_HUMAN_Cyclin-I_OS=Homo_sapiens_GN=CCNI_PE=1_SV=1	Q14094	51.26	cyclin I(CCNI)	Homo sapiens
comp81044_c1_seq27	-1.68929	-1.65436	0.529555	0.498867	-0.0501292	MBD5_MOUSE_Methyl-CpG-binding_domain_protein_5_OS=Mus_musculus_GN=Mbd5_PE=2_SV=1	B1AYB6	50.4	methyl-CpG binding domain protein 5(Mbd5)	Mus musculus
comp81050_c0_seq2	-0.136547	-1.53207	-1.14924	0.594942	0.498887	TRI69_RAT_Tripartite_motif-containing_protein_69_OS=Rattus_norvegicus_GN=Trim69_PE=2_SV=1	Q5BK82	36.78	tripartite motif-containing 69(Trim69)	Rattus norvegicus
comp81050_c1_seq3	0.00128603	-2.17446	-0.785972	1.09175	0.841954	LRRX1_DICDI_Putative_leucine-rich_repeat-containing_protein_DDB_G0290503_OS=Dictyostelium_discoideum_GN=DDB_G0290503_PE=4_SV=1	Q54G05	20.43	hypothetical protein(DDB_G0290503)	Dictyostelium discoideum AX4
comp81067_c1_seq8	-0.853479	-0.673586	0.168289	0.367141	0.348405	SC6A6_CANFA_Sodium-_and_chloride-dependent_taurine_transporter_OS=Canis_familiaris_GN=SLC6A6_PE=1_SV=2	Q00589	53.21	solute carrier family 6 member 6(SLC6A6)	Canis lupus familiaris
comp81121_c2_seq9	-0.509146	-1.18082	0.245675	0.227275	0.128883	SH3G1_CHICK_Endophilin-A2_OS=Gallus_gallus_GN=SH3GL1_PE=1_SV=1	Q8AXV0	90.62	SH3-domain GRB2-like 1(SH3GL1)	Gallus gallus
comp81135_c0_seq1	-0.723657	-1.69232	0.177016	0.769623	-0.223462	GA2L3_HUMAN_GAS2-like_protein_3_OS=Homo_sapiens_GN=GAS2L3_PE=1_SV=1	Q86XJ1	47.38	growth arrest specific 2 like 3(GAS2L3)	Homo sapiens
comp81175_c1_seq4	-0.256504	-0.402239	0.00402371	1.19313	0.25094	FA83C_HUMAN_Protein_FAM83C_OS=Homo_sapiens_GN=FAM83C_PE=1_SV=3	Q9BQN1	53.77	family with sequence similarity 83 member C(FAM83C)	Homo sapiens
comp81224_c1_seq26	-0.837311	-1.17121	0.616224	1.25471	-0.133934	VMP1_RAT_Vacuole_membrane_protein_1_OS=Rattus_norvegicus_GN=Vmp1_PE=1_SV=1	Q91ZQ0	71.79	vacuole membrane protein 1(Vmp1)	Rattus norvegicus
comp81235_c1_seq11	-0.4209	-0.469597	0.398638	0.960181	-0.028971	PABPA_XENLA_Polyadenylate-binding_protein_1-A_OS=Xenopus_laevis_GN=pabpc1-a_PE=1_SV=3	P20965	95.45	poly(A) binding protein, cytoplasmic 1 L homeolog(pabpc1.L)	Xenopus laevis
comp81259_c0_seq2	-0.252908	-0.515891	0.251092	0.9707	0.253379	CSRN1_PONAB_Cysteine/serine-rich_nuclear_protein_1_OS=Pongo_abelii_GN=CSRNP1_PE=2_SV=1	Q5R638	35.25	cysteine and serine rich nuclear protein 1(CSRNP1)	Pongo abelii
comp81291_c4_seq5	-0.395805	-1.08002	0.555623	0.175698	0.0769124	ZN383_MACFA_Zinc_finger_protein_383_OS=Macaca_fascicularis_GN=ZNF383_PE=2_SV=1	Q4R6C2	51.89	zinc finger protein 383(ZNF383)	Macaca fascicularis
comp81310_c2_seq21	-0.383248	-1.58454	0.280937	0.469202	0.0565615	TEAD1_HUMAN_Transcriptional_enhancer_factor_TEF-1_OS=Homo_sapiens_GN=TEAD1_PE=1_SV=2	P28347	85.87	TEA domain transcription factor 1(TEAD1)	Homo sapiens
comp81326_c2_seq1	-1.73064	-0.58204	1.38507	1.44545	0.076437	MEF2C_PIG_Myocyte-specific_enhancer_factor_2C_OS=Sus_scrofa_GN=MEF2C_PE=2_SV=1	A4UTP7	57.46	myocyte enhancer factor 2C(MEF2C)	Sus scrofa
comp81367_c1_seq1	-0.732032	-1.23153	-0.124564	0.356083	0.680188	PVRL1_HUMAN_Poliovirus_receptor-related_protein_1_OS=Homo_sapiens_GN=PVRL1_PE=1_SV=3	Q15223	49.17	nectin cell adhesion molecule 1(NECTIN1)	Homo sapiens
comp81390_c0_seq3	-0.489544	-0.679005	-0.024645	0.47406	0.256002	R1441_DANRE_Probable_E3_ubiquitin-protein_ligase_RNF144A-A_OS=Danio_rerio_GN=rnf144aa_PE=3_SV=1	Q5RFV4	97.95	ring finger protein 144aa(rnf144aa)	Danio rerio
comp81432_c1_seq4	-0.299805	-0.473048	-0.0288877	0.626753	0.290355	EGR1_DANRE_Early_growth_response_protein_1_OS=Danio_rerio_GN=egr1_PE=2_SV=2	P26632	88.65	early growth response 1(egr1)	Danio rerio
comp81432_c1_seq7	-0.362885	-0.523518	0.0511996	0.686898	0.0408026	EGR1_DANRE_Early_growth_response_protein_1_OS=Danio_rerio_GN=egr1_PE=2_SV=2	P26632	92.11	early growth response 1(egr1)	Danio rerio
comp81516_c2_seq7	-0.0874761	-0.699553	-0.293917	0.291487	0.604421	K1C13_ONCMY_Keratin,_type_I_cytoskeletal_13_OS=Oncorhynchus_mykiss_GN=krt13_PE=2_SV=1	Q8JFQ6	80.27	keratin 13(k13)	Oncorhynchus mykiss
comp81664_c1_seq30	-0.804197	-0.563604	0.237947	1.17384	-0.0567725	NUDT6_MOUSE_Nucleoside_diphosphate-linked_moiety_X_motif_6_OS=Mus_musculus_GN=Nudt6_PE=2_SV=1	Q8CH40	57.04	nudix (nucleoside diphosphate linked moiety X)-type motif 6(Nudt6)	Mus musculus
comp81892_c1_seq14	-0.567929	-0.709465	0.51378	0.672364	-0.0104753	TFE3_MOUSE_Transcription_factor_E3_OS=Mus_musculus_GN=Tfe3_PE=1_SV=2	Q64092	55.1	transcription factor E3(Tfe3)	Mus musculus
comp81892_c1_seq17	-0.417853	-0.912458	0.659847	0.571538	0.0588692	TFE3_MOUSE_Transcription_factor_E3_OS=Mus_musculus_GN=Tfe3_PE=1_SV=2	Q64092	55.02	transcription factor E3(Tfe3)	Mus musculus
comp82000_c1_seq3	-0.390652	-0.942924	0.0423037	0.369458	0.111264	TFEB_HUMAN_Transcription_factor_EB_OS=Homo_sapiens_GN=TFEB_PE=1_SV=3	P19484	47.79	transcription factor EB(TFEB)	Homo sapiens
comp82122_c0_seq6	-1.34616	-0.434407	0.197589	0.810021	0.157394	PLEC_RAT_Plectin_OS=Rattus_norvegicus_GN=Plec_PE=1_SV=2	P30427	67.27	plectin(Plec)	Rattus norvegicus
comp82122_c0_seq8	-0.570857	-0.27401	0.244035	0.997627	0.449738	PLEC_RAT_Plectin_OS=Rattus_norvegicus_GN=Plec_PE=1_SV=2	P30427	66.74	plectin(Plec)	Rattus norvegicus
comp82193_c0_seq6	-0.469568	-0.499475	0.187824	0.568694	0.204561	LPP2_BOVIN_Lipid_phosphate_phosphohydrolase_2_OS=Bos_taurus_GN=PPAP2C_PE=2_SV=1	Q2HJ61	70.19	phospholipid phosphatase 2(PLPP2)	Bos taurus
comp82205_c0_seq1	-0.438675	-0.409053	0.252491	0.397938	0.148973	PIM3_COTJA_Serine/threonine-protein_kinase_pim-3_OS=Coturnix_coturnix_japonica_GN=PIM3_PE=2_SV=1	Q9PU85	79.45	Pim-3 proto-oncogene, serine/threonine kinase(PIM3)	Coturnix japonica
comp82312_c3_seq4	-0.482211	-0.421959	0.401638	0.360372	0.0388673	RNF41_DANRE_E3_ubiquitin-protein_ligase_NRDP1_OS=Danio_rerio_GN=rnf41_PE=2_SV=1	Q7ZW16	99.06	ring finger protein 41(rnf41)	Danio rerio
comp82314_c0_seq8	-0.481613	-0.610308	0.261563	0.477801	-0.0882117	AZI2_BOVIN_5-azacytidine-induced_protein_2_OS=Bos_taurus_GN=AZI2_PE=2_SV=1	Q3SYW5	32.47	5-azacytidine induced 2(AZI2)	Bos taurus
comp82463_c0_seq2	-0.782041	-0.839962	0.480278	1.06769	0.0380643	TMM64_HUMAN_Transmembrane_protein_64_OS=Homo_sapiens_GN=TMEM64_PE=2_SV=2	Q6YI46	79.18	transmembrane protein 64(TMEM64)	Homo sapiens
comp82500_c2_seq1	-0.718975	-0.745081	0.393618	0.562439	-0.0970475	CLD5_HUMAN_Claudin-5_OS=Homo_sapiens_GN=CLDN5_PE=1_SV=1	O00501	54.59	claudin 5(CLDN5)	Homo sapiens
comp82536_c0_seq3	-0.351016	-1.04526	0.297698	1.36686	0.149222	HLF_RAT_Hepatic_leukemia_factor_OS=Rattus_norvegicus_GN=Hlf_PE=2_SV=1	Q64709	72.73	HLF, PAR bZIP transcription factor(Hlf)	Rattus norvegicus
comp82536_c0_seq9	-1.58998	-2.1499	0.341372	1.48048	-0.16329	TEF_MOUSE_Thyrotroph_embryonic_factor_OS=Mus_musculus_GN=Tef_PE=2_SV=1	Q9JLC6	76.7	thyrotroph embryonic factor(Tef)	Mus musculus
comp82589_c2_seq9	-0.451524	-0.484954	0.0910074	0.510315	0.00511456	MIDN_DANRE_Midnolin_OS=Danio_rerio_GN=midn_PE=2_SV=1	Q6NYU6	96.91	midnolin(midn)	Danio rerio
comp82592_c0_seq7	-0.0690163	-0.511248	-0.124927	0.211024	0.322024	MYOME_HUMAN_Myomegalin_OS=Homo_sapiens_GN=PDE4DIP_PE=2_SV=1	Q5VU43	39.93	phosphodiesterase 4D interacting protein(PDE4DIP)	Homo sapiens
comp82620_c0_seq12	-0.737119	-0.553384	0.564195	0.852323	-0.156647	NACC1_MOUSE_Nucleus_accumbens-associated_protein_1_OS=Mus_musculus_GN=Nacc1_PE=2_SV=1	Q7TSZ8	61.18	nucleus accumbens associated 1, BEN and BTB (POZ) domain containing(Nacc1)	Mus musculus
comp82666_c1_seq3	-1.35174	-1.46621	1.14104	1.36572	0.042748	INTU_DANRE_Protein_inturned_OS=Danio_rerio_GN=intu_PE=3_SV=1	E7FCN8	67.65	inturned planar cell polarity protein(intu)	Danio rerio
comp82668_c0_seq10	-0.689901	-1.69047	-0.0338053	0.448793	0.370272	CSF3R_HUMAN_Granulocyte_colony-stimulating_factor_receptor_OS=Homo_sapiens_GN=CSF3R_PE=1_SV=1	Q99062	29.15	colony stimulating factor 3 receptor(CSF3R)	Homo sapiens
comp82681_c9_seq7	-0.241352	-0.301159	0.111722	0.418314	0.153057	BCL3_MOUSE_B-cell_lymphoma_3_protein_homolog_OS=Mus_musculus_GN=Bcl3_PE=1_SV=2	Q9Z2F6	41.1	B cell leukemia/lymphoma 3(Bcl3)	Mus musculus
comp82715_c0_seq1	-0.469777	-0.458834	0.38397	0.780777	-0.075565	FOXO1_SPETR_Forkhead_box_protein_O1_OS=Spermophilus_tridecemlineatus_GN=FOXO1_PE=2_SV=1	Q810W5	52.84	forkhead box O1(Foxo1)	Ictidomys tridecemlineatus
comp82715_c0_seq12	-0.79315	-0.455552	0.918215	1.59565	0.0574573	FOXO1_XENLA_Forkhead_box_protein_O1_OS=Xenopus_laevis_GN=foxo1_PE=2_SV=1	Q6EUW2	49.63	forkhead box O1 L homeolog(foxo1.L)	Xenopus laevis
comp82743_c1_seq14	-0.781051	-0.52307	0.428089	0.683851	-0.0560126	POL_MLVMS_Gag-Pol_polyprotein_OS=Moloney_murine_leukemia_virus_(isolate_Shinnick)_GN=gag-pol_PE=1_SV=4	P03355	30.14	Pr180(MLVgp1)	Moloney murine leukemia virus
comp82762_c0_seq23	0.0524296	-0.969279	-0.435795	0.467815	0.894152	LIPB2_HUMAN_Liprin-beta-2_OS=Homo_sapiens_GN=PPFIBP2_PE=1_SV=3	Q8ND30	39.52	PPFIA binding protein 2(PPFIBP2)	Homo sapiens
comp82769_c0_seq1	0.256198	-2.36571	-1.47581	1.07733	0.727576	CFAH_BOVIN_Complement_factor_H_OS=Bos_taurus_GN=CFH_PE=1_SV=3	Q28085	37.04	complement factor H(CFH)	Bos taurus
comp82769_c0_seq4	0.0312106	-2.47196	-1.51514	0.685653	0.419165	CFAH_BOVIN_Complement_factor_H_OS=Bos_taurus_GN=CFH_PE=1_SV=3	Q28085	30.43	complement factor H(CFH)	Bos taurus
comp82769_c0_seq5	-0.132014	-2.05124	-0.583587	0.598131	1.18527	CFAH_BOVIN_Complement_factor_H_OS=Bos_taurus_GN=CFH_PE=1_SV=3	Q28085	30.56	complement factor H(CFH)	Bos taurus
comp82769_c0_seq6	0.0241289	-1.88331	-1.22177	0.64222	0.7772	CFAH_BOVIN_Complement_factor_H_OS=Bos_taurus_GN=CFH_PE=1_SV=3	Q28085	34.51	complement factor H(CFH)	Bos taurus
comp82769_c0_seq7	0.307904	-1.6253	-1.09273	1.34585	0.98484	CFAH_BOVIN_Complement_factor_H_OS=Bos_taurus_GN=CFH_PE=1_SV=3	Q28085	31.06	complement factor H(CFH)	Bos taurus
comp82887_c1_seq9	-0.403175	-0.914235	0.383873	0.646349	-0.00339953	STRN_MOUSE_Striatin_OS=Mus_musculus_GN=Strn_PE=1_SV=2	O55106	77.24	striatin, calmodulin binding protein(Strn)	Mus musculus
comp82913_c0_seq3	-1.19332	-2.53482	1.13718	0.737857	-0.369088	TAF3_HUMAN_Transcription_initiation_factor_TFIID_subunit_3_OS=Homo_sapiens_GN=TAF3_PE=1_SV=1	Q5VWG9	76.74	TATA-box binding protein associated factor 3(TAF3)	Homo sapiens
comp82928_c1_seq1	-0.390728	-0.5832	0.14757	0.429727	0.112643	ATF7_HUMAN_Cyclic_AMP-dependent_transcription_factor_ATF-7_OS=Homo_sapiens_GN=ATF7_PE=1_SV=2	P17544	66.27	activating transcription factor 7(ATF7)	Homo sapiens
comp83025_c0_seq4	-0.665708	-0.504651	-0.102269	0.957446	-0.0512598	ATX1L_HUMAN_Ataxin-1-like_OS=Homo_sapiens_GN=ATXN1L_PE=1_SV=1	P0C7T5	42.42	ataxin 1 like(ATXN1L)	Homo sapiens
comp83045_c1_seq1	-0.595496	-0.679019	0.159726	0.753581	0.448585	CC120_HUMAN_Coiled-coil_domain-containing_protein_120_OS=Homo_sapiens_GN=CCDC120_PE=1_SV=1	Q96HB5	49.41	coiled-coil domain containing 120(CCDC120)	Homo sapiens
comp83045_c1_seq3	-0.904231	-0.631018	-0.0768283	0.448432	0.306071	CC120_HUMAN_Coiled-coil_domain-containing_protein_120_OS=Homo_sapiens_GN=CCDC120_PE=1_SV=1	Q96HB5	49.41	coiled-coil domain containing 120(CCDC120)	Homo sapiens
comp83089_c1_seq13	-0.655282	-0.785438	0.655196	1.13602	-0.223888	KCC2G_RAT_Calcium/calmodulin-dependent_protein_kinase_type_II_subunit_gamma_OS=Rattus_norvegicus_GN=Camk2g_PE=2_SV=1	P11730	91.73	calcium/calmodulin-dependent protein kinase II gamma(Camk2g)	Rattus norvegicus
comp83091_c1_seq2	-0.291763	-0.798922	-0.0215092	1.26261	0.272458	OXSR1_PONAB_Serine/threonine-protein_kinase_OSR1_OS=Pongo_abelii_GN=OXSR1_PE=2_SV=1	Q5R495	71.89	oxidative stress responsive 1(OXSR1)	Pongo abelii
comp83091_c1_seq7	-0.164751	-0.219944	0.24773	1.38209	0.229094	OXSR1_PONAB_Serine/threonine-protein_kinase_OSR1_OS=Pongo_abelii_GN=OXSR1_PE=2_SV=1	Q5R495	75.25	oxidative stress responsive 1(OXSR1)	Pongo abelii
comp83128_c2_seq3	-0.780053	-0.411314	0.0157865	0.235442	0.131662	BR44_MOUSE_Brain_protein_44_OS=Mus_musculus_GN=Brp44_PE=1_SV=1	Q9D023	73.33	mitochondrial pyruvate carrier 2(Mpc2)	Mus musculus
comp83182_c4_seq1	-0.42007	-0.442685	0.0755936	0.0735502	0.20639	INHBA_PIG_Inhibin_beta_A_chain_OS=Sus_scrofa_GN=INHBA_PE=1_SV=1	P03970	59.37	inhibin beta A subunit(INHBA)	Sus scrofa
comp83197_c0_seq3	-0.785805	-1.48408	-0.141115	0.635554	0.381677	ITAM_MOUSE_Integrin_alpha-M_OS=Mus_musculus_GN=Itgam_PE=1_SV=2	P05555	46.15	integrin alpha M(Itgam)	Mus musculus
comp83212_c2_seq1	-0.41024	-0.670393	-0.0927931	1.00726	0.0178727	MK08_DANRE_Mitogen-activated_protein_kinase_8_OS=Danio_rerio_GN=mapk8_PE=2_SV=1	Q9DGD9	97.65	mitogen-activated protein kinase 8b(mapk8b)	Danio rerio
comp83218_c0_seq4	-0.486347	-0.834395	0.121488	0.601472	-0.0376215	TRIM8_HUMAN_Probable_E3_ubiquitin-protein_ligase_TRIM8_OS=Homo_sapiens_GN=TRIM8_PE=2_SV=2	Q9BZR9	81.66	tripartite motif containing 8(TRIM8)	Homo sapiens
comp83256_c0_seq16	-0.421738	-0.469046	-0.0738595	0.89527	0.214463	LAT4_BOVIN_Large_neutral_amino_acids_transporter_small_subunit_4_OS=Bos_taurus_GN=SLC43A2_PE=2_SV=1	Q0VCM6	73.59	solute carrier family 43 member 2(SLC43A2)	Bos taurus
comp83307_c1_seq3	-0.826069	-0.583441	0.299039	0.562925	0.0742539	UBE4A_PONAB_Ubiquitin_conjugation_factor_E4_A_OS=Pongo_abelii_GN=UBE4A_PE=2_SV=2	Q5R9G3	82.73	ubiquitination factor E4A(UBE4A)	Pongo abelii
comp83344_c0_seq1	-0.321971	-0.337066	0.217082	0.847578	0.108561	CTND1_MOUSE_Catenin_delta-1_OS=Mus_musculus_GN=Ctnnd1_PE=1_SV=2	P30999	58.64	catenin (cadherin associated protein), delta 1(Ctnnd1)	Mus musculus
comp83348_c1_seq4	-1.13805	-2.1718	0.81736	0.581739	-0.481797	PRIC3_HUMAN_Prickle-like_protein_3_OS=Homo_sapiens_GN=PRICKLE3_PE=1_SV=2	O43900	70.68	prickle planar cell polarity protein 3(PRICKLE3)	Homo sapiens
comp83389_c0_seq8	-0.28618	-0.452751	0.355576	0.862969	0.271849	JAM3_HUMAN_Junctional_adhesion_molecule_C_OS=Homo_sapiens_GN=JAM3_PE=1_SV=1	Q9BX67	67.35	junctional adhesion molecule 3(JAM3)	Homo sapiens
comp83403_c3_seq3	-0.000198364	-0.512958	-0.106345	0.315928	0.551629	IQEC2_HUMAN_IQ_motif_and_SEC7_domain-containing_protein_2_OS=Homo_sapiens_GN=IQSEC2_PE=1_SV=1	Q5JU85	83.18	IQ motif and Sec7 domain 2(IQSEC2)	Homo sapiens
comp83441_c0_seq6	-0.384112	-0.869787	0.0389543	0.533407	0.279465	PKP3_BOVIN_Plakophilin-3_OS=Bos_taurus_GN=PKP3_PE=2_SV=1	Q08DQ0	48	plakophilin 3(PKP3)	Bos taurus
comp83521_c2_seq1	-0.664233	-0.942585	4.91567	7.21287	0.228206	TAR1_KLULA_Protein_TAR1_OS=Kluyveromyces_lactis_(strain_ATCC_8585_/_CBS_2359_/_DSM_70799_/_NBRC_1267_/_NRRL_Y-1140_/_WM37)_GN=TAR1-A_PE=4_SV=2	Q6CQE5	49.55	hypothetical protein(KLLA0D17600g)	Kluyveromyces lactis NRRL Y-1140
comp83521_c2_seq2	-1.21298	-1.4679	5.25351	7.41998	0.634494	TAR1_YEAST_Protein_TAR1_OS=Saccharomyces_cerevisiae_(strain_ATCC_204508_/_S288c)_GN=TAR1_PE=2_SV=1	Q8TGM6	72.73	Tar1p(TAR1)	Saccharomyces cerevisiae S288C
comp83608_c0_seq5	-1.38101	-1.35714	-0.121483	1.29964	1.23193	ZC12A_MOUSE_Ribonuclease_ZC3H12A_OS=Mus_musculus_GN=Zc3h12a_PE=1_SV=2	Q5D1E7	35.03	zinc finger CCCH type containing 12A(Zc3h12a)	Mus musculus
comp83611_c0_seq5	-0.363125	-0.309407	0.149537	0.454261	0.0873319	IP3KB_HUMAN_Inositol-trisphosphate_3-kinase_B_OS=Homo_sapiens_GN=ITPKB_PE=1_SV=5	P27987	77.63	inositol-trisphosphate 3-kinase B(ITPKB)	Homo sapiens
comp83680_c0_seq1	-1.03892	-0.881512	-0.0245473	1.6509	0.990611	PRLR_ORENI_Prolactin_receptor_OS=Oreochromis_niloticus_GN=prlr_PE=2_SV=1	Q91513	29.15	prolactin receptor(prlr)	Oreochromis niloticus
comp83680_c0_seq12	-0.337091	-0.523008	-0.112836	1.24591	0.6265	PRLR_ORENI_Prolactin_receptor_OS=Oreochromis_niloticus_GN=prlr_PE=2_SV=1	Q91513	29.15	prolactin receptor(prlr)	Oreochromis niloticus
comp83680_c0_seq5	-0.31773	-0.647606	0.160114	1.19766	0.319134	PRLR_ORENI_Prolactin_receptor_OS=Oreochromis_niloticus_GN=prlr_PE=2_SV=1	Q91513	29.59	prolactin receptor(prlr)	Oreochromis niloticus
comp83721_c0_seq9	-0.0820844	-1.2656	0.64705	-0.138378	0.826849	NCOR1_HUMAN_Nuclear_receptor_corepressor_1_OS=Homo_sapiens_GN=NCOR1_PE=1_SV=2	O75376	74.68	nuclear receptor corepressor 1(NCOR1)	Homo sapiens
comp83769_c0_seq16	-0.442921	-0.663061	0.142832	0.584439	0.0996582	RHG06_HUMAN_Rho_GTPase-activating_protein_6_OS=Homo_sapiens_GN=ARHGAP6_PE=1_SV=3	O43182	58.37	Rho GTPase activating protein 6(ARHGAP6)	Homo sapiens
comp83916_c0_seq11	-0.518589	-0.465981	-0.00908248	0.610399	0.0645971	MAFB_DANRE_Transcription_factor_MafB_OS=Danio_rerio_GN=mafb_PE=2_SV=1	Q98UK5	80.7	v-maf avian musculoaponeurotic fibrosarcoma oncogene homolog Ba(mafba)	Danio rerio
comp83916_c0_seq9	-0.612078	-0.83887	0.474593	0.939186	-0.195585	MAFB_DANRE_Transcription_factor_MafB_OS=Danio_rerio_GN=mafb_PE=2_SV=1	Q98UK5	97.5	v-maf avian musculoaponeurotic fibrosarcoma oncogene homolog Ba(mafba)	Danio rerio
comp83937_c0_seq36	-0.797555	-1.09872	1.14227	1.28456	-0.0447029	NAV1_HUMAN_Neuron_navigator_1_OS=Homo_sapiens_GN=NAV1_PE=1_SV=2	Q8NEY1	46.03	neuron navigator 1(NAV1)	Homo sapiens
comp84011_c0_seq11	-0.527531	-0.458473	0.14724	0.984289	0.249095	KLF13_HUMAN_Krueppel-like_factor_13_OS=Homo_sapiens_GN=KLF13_PE=1_SV=1	Q9Y2Y9	55.17	Kruppel like factor 13(KLF13)	Homo sapiens
comp84230_c0_seq4	-0.386665	-0.60538	0.190187	0.312147	0.297591	CAR11_HUMAN_Caspase_recruitment_domain-containing_protein_11_OS=Homo_sapiens_GN=CARD11_PE=1_SV=3	Q9BXL7	63.93	caspase recruitment domain family member 11(CARD11)	Homo sapiens
comp84477_c1_seq8	-0.498693	-0.579959	-0.0585995	0.617971	0.0711791	TNR6A_MOUSE_Trinucleotide_repeat-containing_gene_6A_protein_OS=Mus_musculus_GN=Tnrc6a_PE=1_SV=1	Q3UHK8	50.5	trinucleotide repeat containing 6a(Tnrc6a)	Mus musculus
comp84526_c1_seq1	0.54841	-2.46471	0.207857	-2.83442	1.80198	FREM2_HUMAN_FRAS1-related_extracellular_matrix_protein_2_OS=Homo_sapiens_GN=FREM2_PE=1_SV=2	Q5SZK8	96.83	FRAS1 related extracellular matrix protein 2(FREM2)	Homo sapiens
comp84572_c1_seq26	-0.861758	-1.09504	0.731107	0.84236	-0.371759	SOX6_PONAB_Transcription_factor_SOX-6_OS=Pongo_abelii_GN=SOX6_PE=2_SV=1	Q5RCU4	77.22	SRY-box 6(SOX6)	Pongo abelii
comp84632_c1_seq29	-1.58683	-1.22133	1.07416	0.754481	0.101805	CIZ1_HUMAN_Cip1-interacting_zinc_finger_protein_OS=Homo_sapiens_GN=CIZ1_PE=1_SV=2	Q9ULV3	38.3	CDKN1A interacting zinc finger protein 1(CIZ1)	Homo sapiens
comp84670_c0_seq8	-0.775401	-0.723832	0.22554	0.913727	0.205537	DICER_DANRE_Endoribonuclease_Dicer_OS=Danio_rerio_GN=dicer1_PE=2_SV=2	Q6TV19	92.76	dicer 1, ribonuclease type III(dicer1)	Danio rerio
comp84702_c2_seq1	-0.263574	-0.490856	0.149325	0.32687	0.127955	AVR2A_CHICK_Activin_receptor_type-2A_OS=Gallus_gallus_GN=ACVR2A_PE=2_SV=1	Q90669	78.81	activin A receptor, type IIA(ACVR2A)	Gallus gallus
comp84743_c0_seq1	-0.455184	-0.443381	0.183165	0.328872	0.0274154	M3K11_RAT_Mitogen-activated_protein_kinase_kinase_kinase_11_OS=Rattus_norvegicus_GN=Map3k11_PE=1_SV=1	Q66HA1	66.84	mitogen-activated protein kinase kinase kinase 11(Map3k11)	Rattus norvegicus
comp84850_c0_seq9	-0.978094	-1.39967	1.28675	1.32784	-0.585839	PMEPA_HUMAN_Transmembrane_prostate_androgen-induced_protein_OS=Homo_sapiens_GN=PMEPA1_PE=1_SV=1	Q969W9	53.92	prostate transmembrane protein, androgen induced 1(PMEPA1)	Homo sapiens
comp84864_c0_seq16	-0.534609	-0.59862	0.43994	0.614863	-0.088033	PELI1_MOUSE_E3_ubiquitin-protein_ligase_pellino_homolog_1_OS=Mus_musculus_GN=Peli1_PE=2_SV=2	Q8C669	85.39	pellino 1(Peli1)	Mus musculus
comp84943_c0_seq9	-0.584623	-0.766631	0.0822635	0.745511	0.124609	RBM47_PONAB_RNA-binding_protein_47_OS=Pongo_abelii_GN=RBM47_PE=2_SV=2	Q5R5P4	81.64	RNA binding motif protein 47(RBM47)	Pongo abelii
comp84976_c0_seq14	-0.189823	-0.666679	-0.0414925	0.45528	0.413811	DMP4_MOUSE_Dentin_matrix_protein_4_OS=Mus_musculus_GN=Fam20c_PE=2_SV=1	Q5MJS3	71.73	family with sequence similarity 20, member C(Fam20c)	Mus musculus
comp84977_c1_seq1	-1.05914	-1.67422	0.942316	0.773658	-0.582322	I2BP1_DANRE_Interferon_regulatory_factor_2-binding_protein_1_OS=Danio_rerio_GN=irf2bp1_PE=2_SV=1	Q1LV17	84.3	interferon regulatory factor 2 binding protein 1(irf2bp1)	Danio rerio
comp85156_c1_seq1	-0.622238	-0.627098	0.0659807	0.624969	0.297968	LRIG2_HUMAN_Leucine-rich_repeats_and_immunoglobulin-like_domains_protein_2_OS=Homo_sapiens_GN=LRIG2_PE=1_SV=3	O94898	54.29	leucine rich repeats and immunoglobulin like domains 2(LRIG2)	Homo sapiens
comp85335_c0_seq1	-0.297385	-0.360984	0.0781709	0.914072	0.198146	HIPK3_HUMAN_Homeodomain-interacting_protein_kinase_3_OS=Homo_sapiens_GN=HIPK3_PE=1_SV=1	Q9H422	57.12	homeodomain interacting protein kinase 3(HIPK3)	Homo sapiens
comp85407_c1_seq3	-0.418109	-0.51897	0.542789	0.940773	0.0257886	CRTC3_XENTR_CREB-regulated_transcription_coactivator_3_OS=Xenopus_tropicalis_GN=crtc3_PE=2_SV=1	Q0IHT3	62.04	CREB regulated transcription coactivator 3(crtc3)	Xenopus tropicalis
comp85729_c0_seq1	0.357076	-0.249455	1.23821	-1.41203	1.21594	S3AD_ECOLX_Streptomycin_3''-adenylyltransferase_OS=Escherichia_coli_GN=aadA_PE=4_SV=1	P0AG05	100	aminoglycoside resistance protein(aadA)	Escherichia coli
comp87971_c0_seq1	0.162134	-0.663743	0.0718363	-2.3599	0.772807	HMCS2_MOUSE_Hydroxymethylglutaryl-CoA_synthase,_mitochondrial_OS=Mus_musculus_GN=Hmgcs2_PE=1_SV=2	P54869	100	3-hydroxy-3-methylglutaryl-Coenzyme A synthase 2(Hmgcs2)	Mus musculus
